# Supplementary material for: Why Don’t More Mitochondrial Diseases Exhibit Cardiomyopathy?
Source: MDPI journal article supplement (doi:10.3390/jcdd10040154), 2023-04-01
Supplement: s1 [file s1]

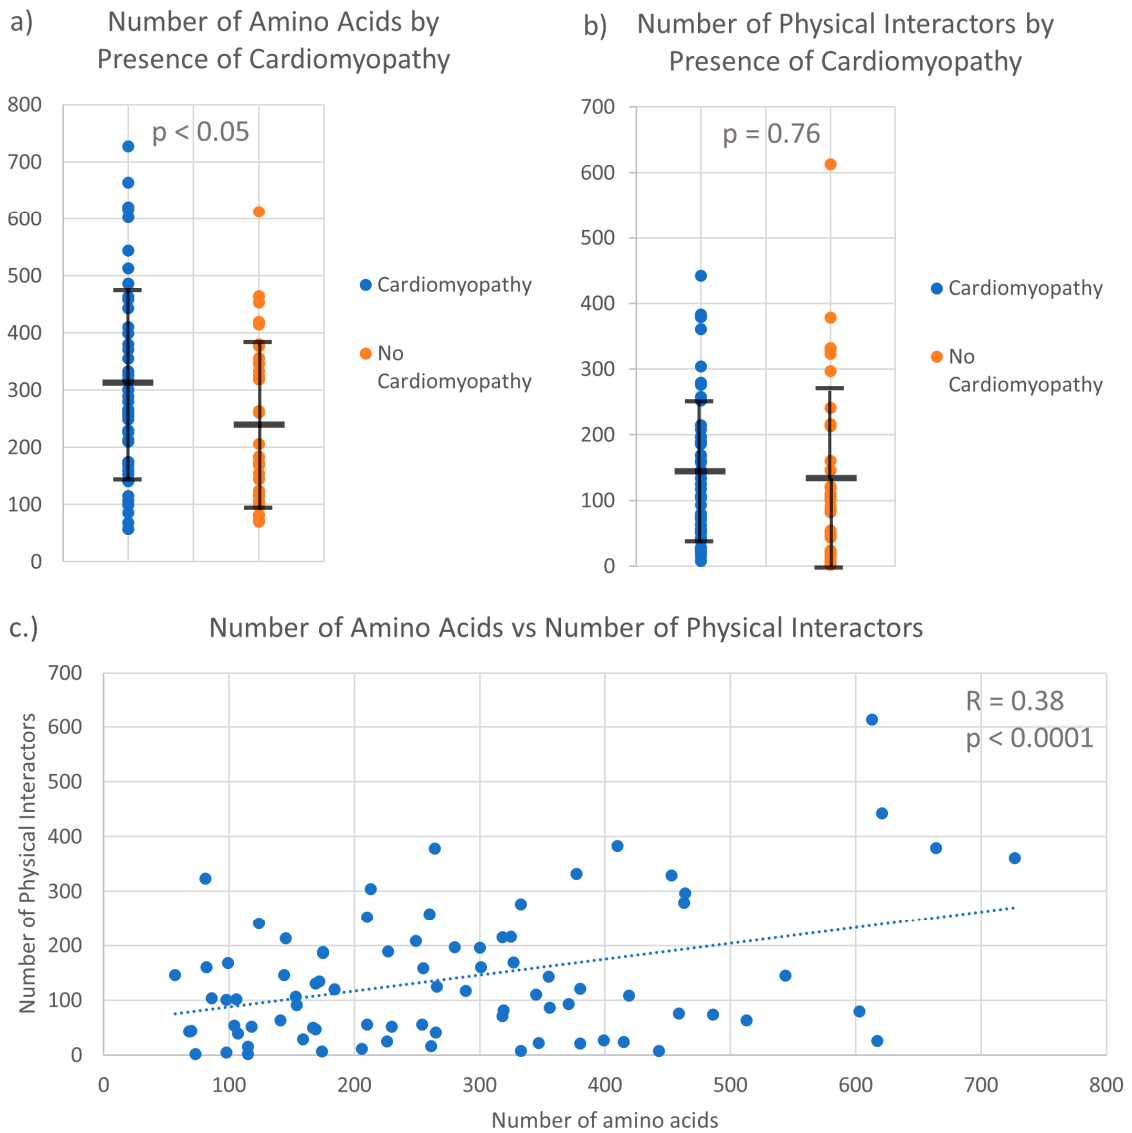

**Figure S1:** Amino Acid and Physical Interactor Analysis of OXPHOS Genes. (a) Number of Amino Acids by the Presence of Cardiomyopathy, (b) Number of Physical Interactors by the Presence of Cardiomyopathy, (c) Relationship Between Protein Size and Number of Physical Interactors.
